# Supplementary material
Source: publisher figshare collection journal article supplement (https://gsajournals.figshare.com/ndownloader/files/20178131)
Supplement: Supplementary file 1 [file 20178131]

**Table S1.** Primers used in this study

| Name | Sequence (5’-3’) |
| --- | --- |
| TRR1-F | TATGATGGCGAACGGTATTGCTG |
| TRR1-R | ACAGGTTCTGCGTCTTCGTTAAATTC |
| TRX2-F | ATGGTCACTCAATTAAAATCCGCTTC |
| TRX2-R | TTGTAGAAGATTAGGGTAGGCATGGAAG |
| GSH1-F | TCCATATTTGAATTACGTGGGTAGTTACG |
| GSH1-R | AAGCGGCATTTTTATGATTCCACG |
| SOD1-F | TGTTAAAGGGTGATGCCGGTGTCTC |
| SOD1-R | TTCGTCAGTTGGAGCACCATGTGTC |
| CTT1-F | TTCCTCAGAGACGCTATTAAGTTTCCC |
| CTT1-R | TCTTTGTTGACCATGATGAAGGAATGAC |
| GPX2-F | AATGCAAGGACAAGAAAGGCGAATC |
| GPX2-R | TTCCTGCTTCCCGAACTGATTACATG |
| PGK1-RT-F | TACGTTGTCTTGGCTTCTCACTTGG |
| PGK1-RT-R | TTGGAAGCCTTGACCTTTTGACC |

**Supplementary Table 2** List of 48 genes whose deletion mutants were also sensitive to zinc stress response reported previously

| **Gene** | **Systematic Name** | **Chemical** | **Reference** |
| --- | --- | --- | --- |
| ATS1 | YAL020C | 1 uM zinc dichloride | ([North *et al.* 2012](#_ENREF_4)) |
| CCR4 | YAL021C | 4 mM zinc dichloride | ([Pagani *et al.* 2007](#_ENREF_5)) |
| SHP1 | YBL058W | 4 mM zinc dichloride | ([Pagani et al. 2007](#_ENREF_5)) |
| VPS15 | YBR097W | 4 mM zinc dichloride | ([Sambade *et al.* 2005](#_ENREF_7)) |
| VPS15 | YBR097W | 2 mM zinc dichloride | ([Pagani et al. 2007](#_ENREF_5)) |
| VMA2 | YBR127C | 2 mM zinc dichloride | ([Pagani et al. 2007](#_ENREF_5)) |
| VMA2 | YBR127C | zinc dichloride | ([Hoepfner *et al.* 2014](#_ENREF_2)) |
| VMA2 | YBR127C | zinc dichloride | ([Hoepfner et al. 2014](#_ENREF_2)) |
| CCZ1 | YBR131W | 5 mM zinc dichloride | ([Kucharczyk *et al.* 1999](#_ENREF_3)) |
| CCZ1 | YBR131W | 5 mM zinc dichloride | ([Kucharczyk et al. 1999](#_ENREF_3)) |
| CCZ1 | YBR131W | zinc dichloride | ([Hoepfner et al. 2014](#_ENREF_2)) |
| CCZ1 | YBR131W | 1 uM zinc dichloride | ([North et al. 2012](#_ENREF_4)) |
| ATG22 | YCL038C | 1 uM zinc dichloride | ([North et al. 2012](#_ENREF_4)) |
| PAT1 | YCR077C | 1 uM zinc dichloride | ([North et al. 2012](#_ENREF_4)) |
| SRB8 | YCR081W | 1 uM zinc dichloride | ([North et al. 2012](#_ENREF_4)) |
| CSM1 | YCR086W | 1 uM zinc dichloride | ([North et al. 2012](#_ENREF_4)) |
| SRF1 | YDL133W | 1 uM zinc dichloride | ([North et al. 2012](#_ENREF_4)) |
| DHH1 | YDL160C | 6 mM zinc dichloride | ([Pagani et al. 2007](#_ENREF_5)) |
| REG1 | YDR028C | 1 uM zinc dichloride | ([North et al. 2012](#_ENREF_4)) |
| YDR203W | YDR203W | zinc dichloride | ([Hoepfner et al. 2014](#_ENREF_2)) |
| PMP3 | YDR276C | 1 uM zinc dichloride | ([North et al. 2012](#_ENREF_4)) |
| NHX1 | YDR456W | 1 uM zinc dichloride | ([North et al. 2012](#_ENREF_4)) |
| SLX8 | YER116C | 1 uM zinc dichloride | ([North et al. 2012](#_ENREF_4)) |
| DEG1 | YFL001W | 1 uM zinc dichloride | ([North et al. 2012](#_ENREF_4)) |
| MDJ1 | YFL016C | 1 uM zinc dichloride | ([North et al. 2012](#_ENREF_4)) |
| AFT1 | YGL071W | 4 mM zinc dichloride | ([Sambade et al. 2005](#_ENREF_7)) |
| AFT1 | YGL071W | 2 mM zinc dichloride | ([Pagani et al. 2007](#_ENREF_5)) |
| VPS45 | YGL095C | 4 mM zinc dichloride | ([Banuelos *et al.* 2010](#_ENREF_1)) |
| VPS45 | YGL095C | 4 mM zinc dichloride | ([Pagani et al. 2007](#_ENREF_5)) |
| MON1 | YGL124C | 4 mM zinc dichloride | ([Pagani et al. 2007](#_ENREF_5)) |
| MON1 | YGL124C | zinc dichloride | ([Hoepfner et al. 2014](#_ENREF_2)) |
| MON1 | YGL124C | 1 uM zinc dichloride | ([North et al. 2012](#_ENREF_4)) |
| VAM7 | YGL212W | 1 uM zinc dichloride | ([North et al. 2012](#_ENREF_4)) |
| VMA21 | YGR105W | 2 mM zinc dichloride | ([Pagani et al. 2007](#_ENREF_5)) |
| VMA21 | YGR105W | zinc dichloride | ([Hoepfner et al. 2014](#_ENREF_2)) |
| NEM1 | YHR004C | 1 uM zinc dichloride | ([North et al. 2012](#_ENREF_4)) |
| VMA16 | YHR026W | 2 mM zinc dichloride | ([Pagani et al. 2007](#_ENREF_5)) |
| VMA16 | YHR026W | zinc dichloride | ([Hoepfner et al. 2014](#_ENREF_2)) |
| VTC4 | YJL012C | 6 mM zinc dichloride | ([Pagani et al. 2007](#_ENREF_5)) |
| APS3 | YJL024C | zinc dichloride | ([Hoepfner et al. 2014](#_ENREF_2)) |
| APS3 | YJL024C | 1 uM zinc dichloride | ([North et al. 2012](#_ENREF_4)) |
| LSM1 | YJL124C | 1 uM zinc dichloride | ([North et al. 2012](#_ENREF_4)) |
| VPS35 | YJL154C | 1 uM zinc dichloride | ([North et al. 2012](#_ENREF_4)) |
| RCY1 | YJL204C | 4 mM zinc dichloride | ([Pagani et al. 2007](#_ENREF_5)) |
| RCY1 | YJL204C | zinc dichloride | ([Rieger *et al.* 1999](#_ENREF_6)) |
| RCY1 | YJL204C | 1 uM zinc dichloride | ([North et al. 2012](#_ENREF_4)) |
| NUC1 | YJL208C | 1 uM zinc dichloride | ([North et al. 2012](#_ENREF_4)) |
| YJL211C | YJL211C | 1 uM zinc dichloride | ([North et al. 2012](#_ENREF_4)) |
| VPH2 | YKL119C | 2 mM zinc dichloride | ([Pagani et al. 2007](#_ENREF_5)) |
| VPH2 | YKL119C | zinc dichloride | ([Hoepfner et al. 2014](#_ENREF_2)) |
| VPS51 | YKR020W | 4 mM zinc dichloride | ([Pagani et al. 2007](#_ENREF_5)) |
| VPS51 | YKR020W | 1 uM zinc dichloride | ([North et al. 2012](#_ENREF_4)) |
| SWI6 | YLR182W | 4 mM zinc dichloride | ([Pagani et al. 2007](#_ENREF_5)) |
| YPT6 | YLR262C | 1 uM zinc dichloride | ([North et al. 2012](#_ENREF_4)) |
| SEC22 | YLR268W | 4 mM zinc dichloride | ([Pagani et al. 2007](#_ENREF_5)) |
| TUS1 | YLR425W | 1 uM zinc dichloride | ([North et al. 2012](#_ENREF_4)) |
| VMA6 | YLR447C | 2 mM zinc dichloride | ([Pagani et al. 2007](#_ENREF_5)) |
| ZRC1 | YMR243C | 6 mM zinc dichloride | ([Pagani et al. 2007](#_ENREF_5)) |
| ZRC1 | YMR243C | zinc dichloride | ([Hoepfner et al. 2014](#_ENREF_2)) |
| ZRC1 | YMR243C | zinc dichloride | ([Hoepfner et al. 2014](#_ENREF_2)) |
| ARP5 | YNL059C | 6 mM zinc dichloride | ([Pagani et al. 2007](#_ENREF_5)) |
| RPL16B | YNL069C | 1 uM zinc dichloride | ([North et al. 2012](#_ENREF_4)) |
| BNI1 | YNL271C | 1 uM zinc dichloride | ([North et al. 2012](#_ENREF_4)) |
| LEM3 | YNL323W | 1 uM zinc dichloride | ([North et al. 2012](#_ENREF_4)) |
| VPH1 | YOR270C | 4 mM zinc dichloride | ([Pagani et al. 2007](#_ENREF_5)) |
| VPH1 | YOR270C | zinc dichloride | ([Hoepfner et al. 2014](#_ENREF_2)) |
| VPH1 | YOR270C | 1 uM zinc dichloride | ([North et al. 2012](#_ENREF_4)) |
| VPS16 | YPL045W | 4 mM zinc dichloride | ([Sambade et al. 2005](#_ENREF_7)) |
| VPS16 | YPL045W | 2 mM zinc dichloride | ([Pagani et al. 2007](#_ENREF_5)) |
| HFI1 | YPL254W | 1 uM zinc dichloride | ([North et al. 2012](#_ENREF_4)) |
| YPL261C | YPL261C | 1 uM zinc dichloride | ([North et al. 2012](#_ENREF_4)) |
| PLC1 | YPL268W | 6 mM zinc dichloride | ([Pagani et al. 2007](#_ENREF_5)) |
| YCL007C | YCL007C | 2 mM zinc dichloride | ([Pagani et al. 2007](#_ENREF_5)) |
| VMA5 | YKL080W | 2 mM zinc dichloride | ([Pagani et al. 2007](#_ENREF_5)) |

Banuelos, M.G., D.E. Moreno, D.K. Olson, Q. Nguyen, F. Ricarte *et al.*, 2010 Genomic analysis of severe hypersensitivity to hygromycin B reveals linkage to vacuolar defects and new vacuolar gene functions in *Saccharomyces cerevisiae*. Curr. Genet. 56 (2):121-137.

Hoepfner, D., S.B. Helliwell, H. Sadlish, S. Schuierer, I. Filipuzzi *et al.*, 2014 High-resolution chemical dissection of a model eukaryote reveals targets, pathways and gene functions. Microbiol Res. 169 (2-3):107-120.

Kucharczyk, R., R. Gromadka, A. Migdalski, P.P. Slonimski, and J. Rytka, 1999 Disruption of six novel yeast genes located on chromosome II reveals one gene essential for vegetative growth and two required for sporulation and conferring hypersensitivity to various chemicals. Yeast 15 (10B):987-1000.

North, M., J. Steffen, A.V. Loguinov, G.R. Zimmerman, C.D. Vulpe *et al.*, 2012 Genome-wide functional profiling identifies genes and processes important for zinc-limited growth of *Saccharomyces cerevisiae*. PLoS Genet. 8 (6):e1002699.

Pagani, M.A., A. Casamayor, R. Serrano, S. Atrian, and J. Arino, 2007 Disruption of iron homeostasis in *Saccharomyces cerevisiae* by high zinc levels: a genome-wide study. Mol. Microbiol. 65 (2):521-537.

Rieger, K.J., M. El-Alama, G. Stein, C. Bradshaw, P.P. Slonimski *et al.*, 1999 Chemotyping of yeast mutants using robotics. Yeast 15 (10B):973-986.

Sambade, M., M. Alba, A.M. Smardon, R.W. West, and P.M. Kane, 2005 A genomic screen for yeast vacuolar membrane ATPase mutants. Genetics 170 (4):1539-1551.
